# Supplementary material
Source: Springer Nature journal article supplement (https://www.springermedizin.de/resource/supplementary/12958_2010_801_MOESM3_ESM.pdf/9568840)

**A.**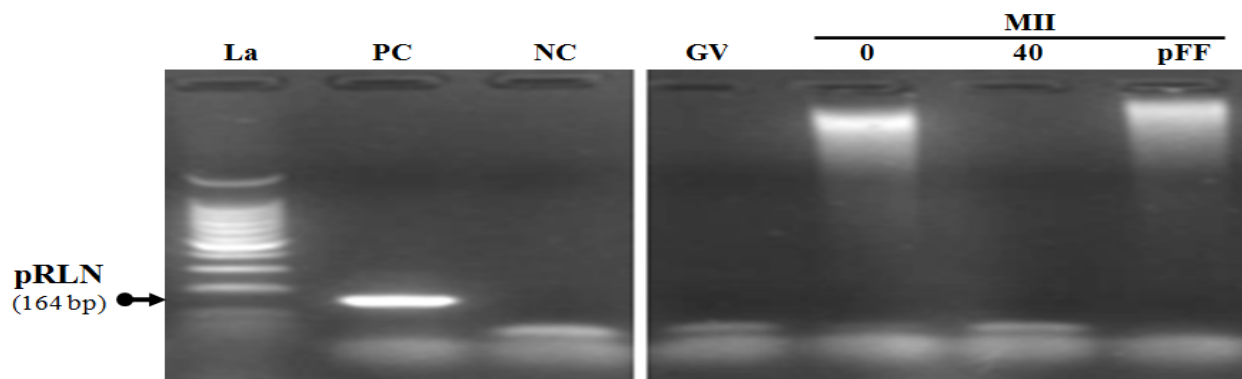**B.**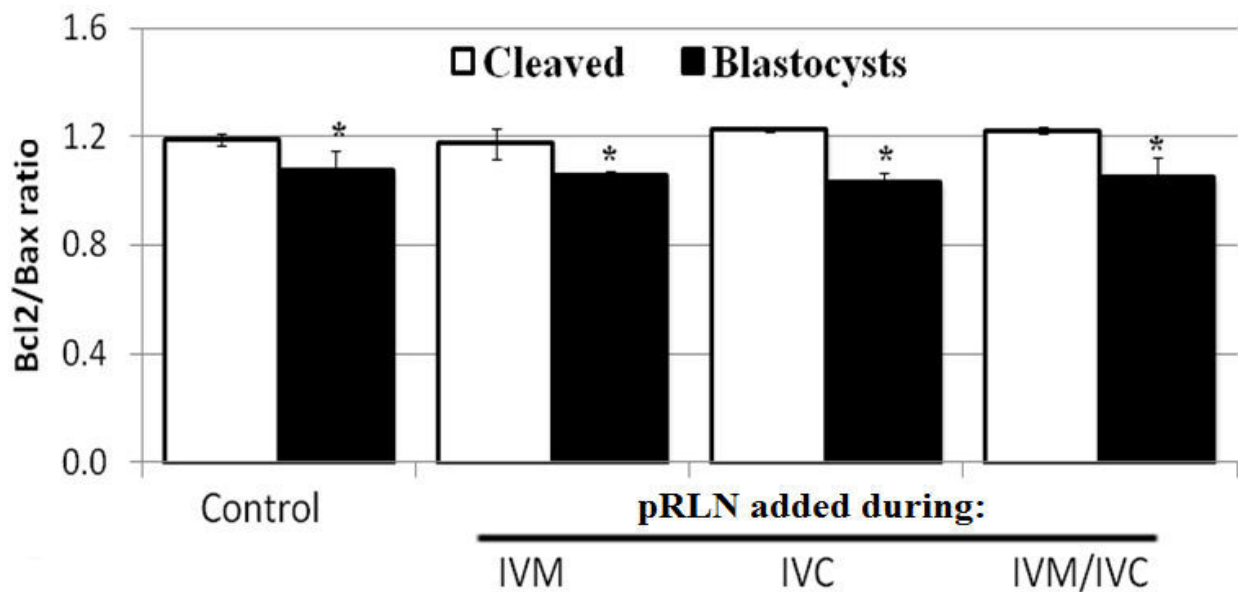

Supplement: MOESM3 [file 9568840]
